# Supplementary material for: Serial Assessment of Shock Severity in Cardiac Intensive Care Unit Patients
Source: PubMed Central journal article supplement — J Am Heart Assoc. 2023 Nov 28;12(23):e032748. doi: 10.1161/JAHA.123.032748 (PMC10727310; doi:10.1161/jaha.123.032748), 2023-11-28
Supplement: JAH3-12-e032748-s001.pdf [file JAH3-12-e032748-s001.pdf]

# **SUPPLEMENTAL MATERIAL**

**Table S1. Study definitions used to assign the SCAI Shock Classification.**

| Variable                                                                                               | Definition                                                                                                                                                                                                                                                                                                                                                                                                                                                                                                                                                                                                                                                                                       |
|--------------------------------------------------------------------------------------------------------|--------------------------------------------------------------------------------------------------------------------------------------------------------------------------------------------------------------------------------------------------------------------------------------------------------------------------------------------------------------------------------------------------------------------------------------------------------------------------------------------------------------------------------------------------------------------------------------------------------------------------------------------------------------------------------------------------|
| <b>HYPOTENSION / TACHYCARDIA</b><br>➤ Defines stage B if present (in the absence of hypoperfusion)     | <ol style="list-style-type: none"> <li>1. Minimum SBP &lt;90 mmHg</li> <li>2. Maximum heart rate &gt;100 BPM</li> <li>3. Minimum MAP &lt;65 mmHg</li> <li>4. Inotrope infusion</li> <li>5. Maximum shock index (maximum heart rate / minimum SBP) <math>\geq 1</math> for any hour</li> <li>6. Mean shock index (mean heart rate / mean SBP) <math>\geq 1</math> for any hour</li> </ol>                                                                                                                                                                                                                                                                                                         |
| <b>HYPOPERFUSION</b><br>➤ Identifies the presence of SHOCK (including stage C, D & E) if present       | <ol style="list-style-type: none"> <li>1. Exam hypoperfusion</li> <li>2. Lactate <math>\geq 2</math> mmol/L</li> <li>3. Vasopressor infusion or bolus vasopressors</li> <li>4. Any MCS</li> <li>5. ALT &gt;200 IU/ml</li> <li>6. AKI (either of these criteria)               <ol style="list-style-type: none"> <li>a. Urine output &lt;120 ml over 4 hours <i>and</i> &lt;240 ml over 8 hours</li> <li>b. Maximum creatinine during block <math>\geq 0.3</math> mg/dl higher than either the first creatinine during block or most recent prior creatinine (even if in an earlier block)</li> </ol> </li> </ol>                                                                                |
| <b>DETERIORATION</b><br>➤ Defines stage D if present (in the absence of criteria for refractory shock) | <ol style="list-style-type: none"> <li>1. Rising # pressors (second 2 hours versus first 2 hours)</li> <li>2. Rising VIS (second 2 hours versus first 2 hours)</li> <li>3. Rising NEE (second 2 hours versus first 2 hours)</li> <li>4. Maximum lactate during block higher than either first lactate during block or most recent prior lactate (even if in an earlier block)</li> </ol>                                                                                                                                                                                                                                                                                                         |
| <b>REFRACTORY</b><br>➤ Defines stage E if present                                                      | <ol style="list-style-type: none"> <li>1. Cardiac arrest</li> <li>2. Bolus vasopressors</li> <li>3. Lactate <math>\geq 10</math> mmol/L</li> <li>4. Severe hypotension while on vasopressors (during either the first 2 hours or the second 2 hours of the 4-hour block)               <ol style="list-style-type: none"> <li>a. Mean MAP &lt;50 mmHg</li> <li>b. Mean SBP &lt;80 mmHg</li> </ol> </li> <li>5. High-dose vasopressor infusion(s)               <ol style="list-style-type: none"> <li>a. VIS &gt;50</li> <li>b. NEE &gt;0.5</li> <li>c. CVI &gt;8</li> <li>d. # vasopressors &gt;2</li> <li>e. # vasopressors &gt;1 and MCS</li> <li>f. &gt;1 MCS devices</li> </ol> </li> </ol> |

Missing data were assumed to be normal per convention. Only data recorded or obtained during a given 4-hour CICU block were used to assign the SCAI Shock Stage in that 4-hour block except as otherwise specified.

AKI, acute kidney injury; ALT, alanine aminotransferase; CICU, cardiac intensive care unit; CVI, Cumulative Vasopressor Index; MAP, mean arterial pressure; MCS, mechanical circulatory support; NEE, norepinephrine equivalent dose; SBP, systolic blood pressure; SCAI, Society for Cardiovascular Angiography and Interventions; VIS, Vasoactive-Inotropic Score

**Table S2. Unadjusted logistic regression models for prediction of in-hospital mortality, including unit odds ratio (OR) values with 95% confidence intervals (CI) and area under the receiver-operator characteristic curve (AUC, C-statistic) according to admission diagnosis.**

| Variable                    | ACS                    |      | Heart failure          |      | Cardiac arrest         |      |
|-----------------------------|------------------------|------|------------------------|------|------------------------|------|
|                             | Unadjusted OR (95% CI) | AUC  | Unadjusted OR (95% CI) | AUC  | Unadjusted OR (95% CI) | AUC  |
| Any shock                   | 7.07<br>(4.05-12.34)   | 0.69 | 4.67<br>(3.14-6.94)    | 0.65 | 1.82<br>(1.06-3.12)    | 0.56 |
| Number of blocks with shock | 1.51<br>(1.38-1.65)    | 0.76 | 1.39<br>(1.30-1.49)    | 0.71 | 1.13<br>(1.02-1.25)    | 0.58 |
| Admission SCAI Shock Stage  | 2.24<br>(1.87-2.68)    | 0.72 | 1.94<br>(1.69-2.22)    | 0.68 | 1.54<br>(1.28-1.85)    | 0.64 |
| Maximum SCAI Shock Stage    | 2.86<br>(2.35-3.50)    | 0.77 | 2.41<br>(2.07-2.81)    | 0.72 | 1.59<br>(1.30-1.94)    | 0.64 |
| Minimum SCAI Shock Stage    | 3.10<br>(2.48-3.88)    | 0.72 | 2.46<br>(2.07-2.92)    | 0.67 | 2.04<br>(1.60-2.60)    | 0.67 |
| Mean SCAI Shock Stage       | 4.77<br>(3.65-6.24)    | 0.82 | 3.51<br>(2.88-4.27)    | 0.76 | 2.22<br>(1.72-2.88)    | 0.70 |

The SCAI Shock Classification was analyzed as a continuous variable to generate the unit OR value per each higher SCAI Shock Stage. Admission diagnoses are defined using ICD-10 codes documented within one day of CICU admission. ACS, acute coronary syndrome; ICD, International Classification of Diseases; SCAI, Society for Cardiovascular Angiography and Interventions.

**Figure S1. Construction of the final study population, with the distribution SCAI shock stages in each CICU block, including patients who left the CICU during a prior block (CICU deaths and CICU discharges).**

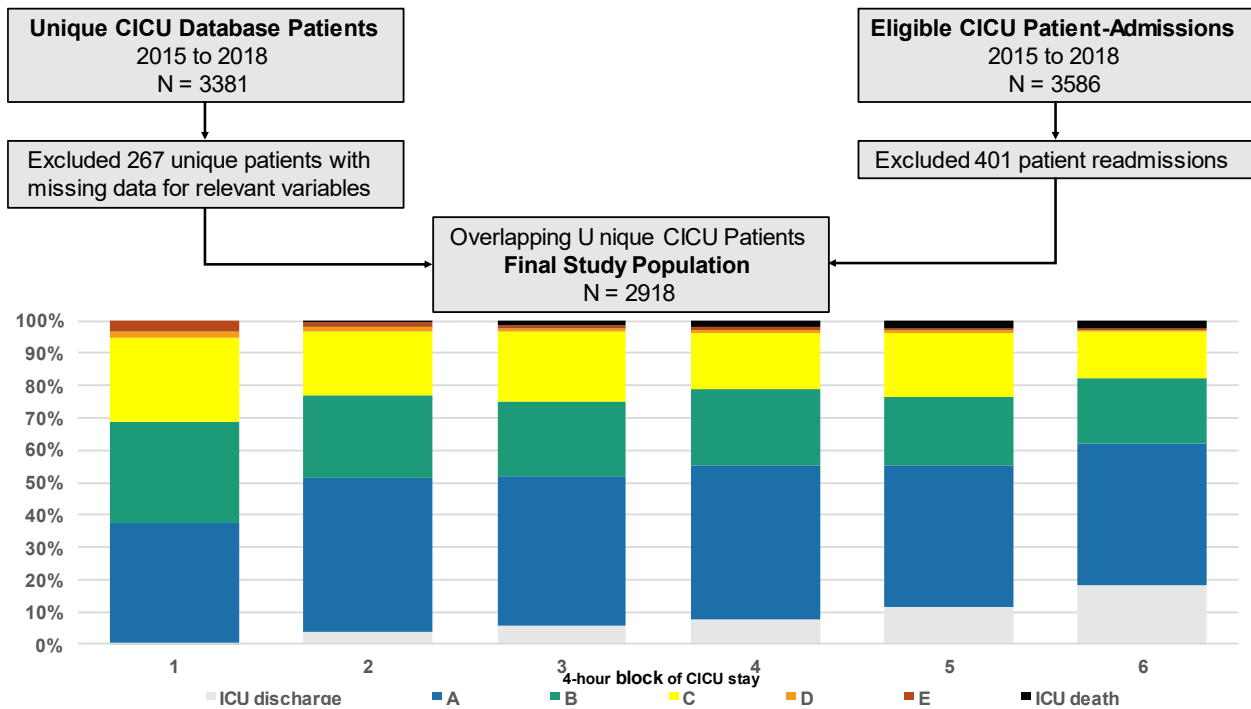

CICU, cardiac intensive care unit; SCAI, Society for Cardiovascular Angiography and Interventions.

**Figure S2. Number of hypoperfusion criteria met (lactate  $\geq 2$  mmol/L, vasopressors, temporary mechanical circulatory support, acute kidney injury) during the first 24 hours among patients with shock, according to maximum SCAI Shock stage.**

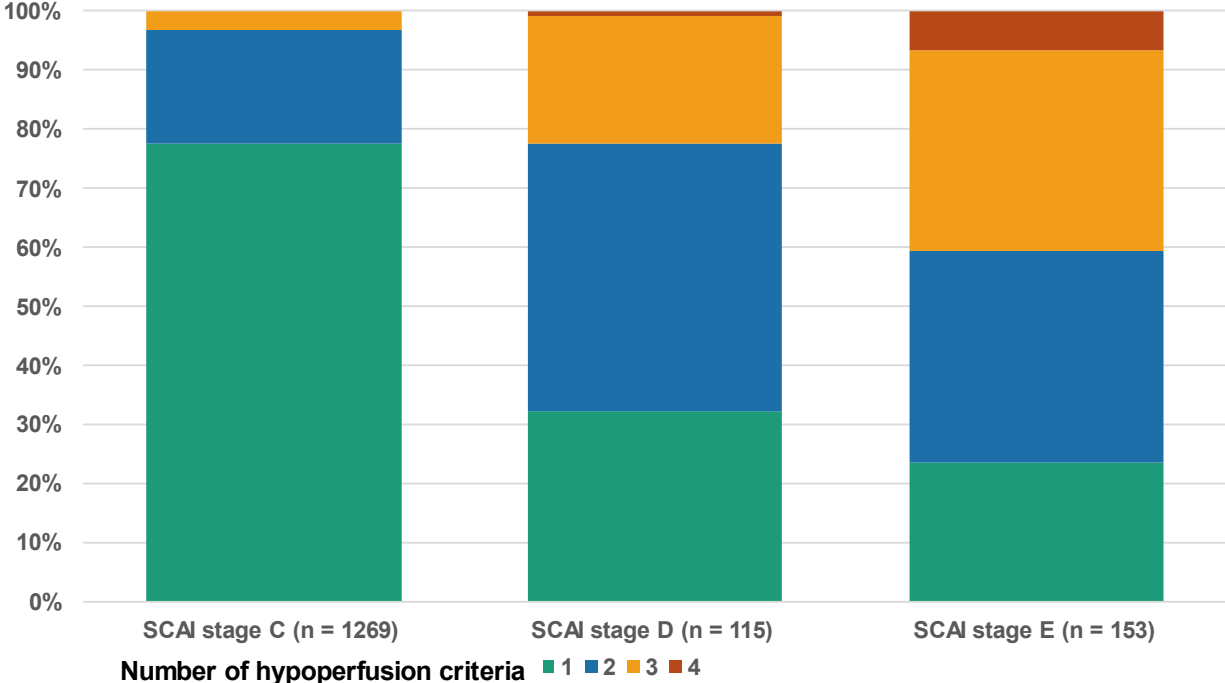

SCAI, Society for Cardiovascular Angiography and Interventions.

**Figure S3. CICU and in-hospital mortality according to the number of hypoperfusion criteria met (lactate  $\geq$ 2 mmol/L, vasopressors, temporary mechanical circulatory support, acute kidney injury) during the first 24 hours.**

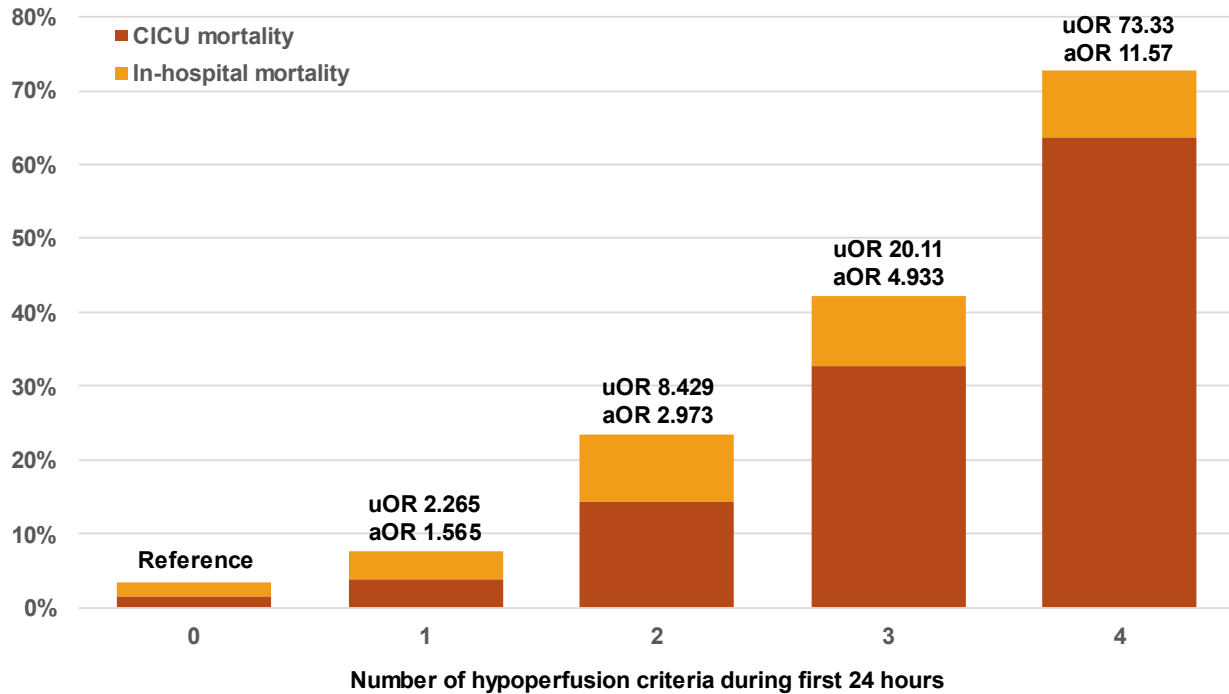

All hypoperfusion groups  $p < 0.05$  compared with the no hypoperfusion group for prediction of in-hospital mortality before and after multivariable adjustment. aOR, adjusted odds ratio; CICU, cardiac intensive care unit; uOR, unadjusted odds ratio

**Figure S4. Area under the receiver-operator characteristic curve (AUC, C-statistic) values for discrimination of in-hospital mortality by serial evaluation of the presence of shock and the SCAI Shock Classification in each subsequent CICU block.**

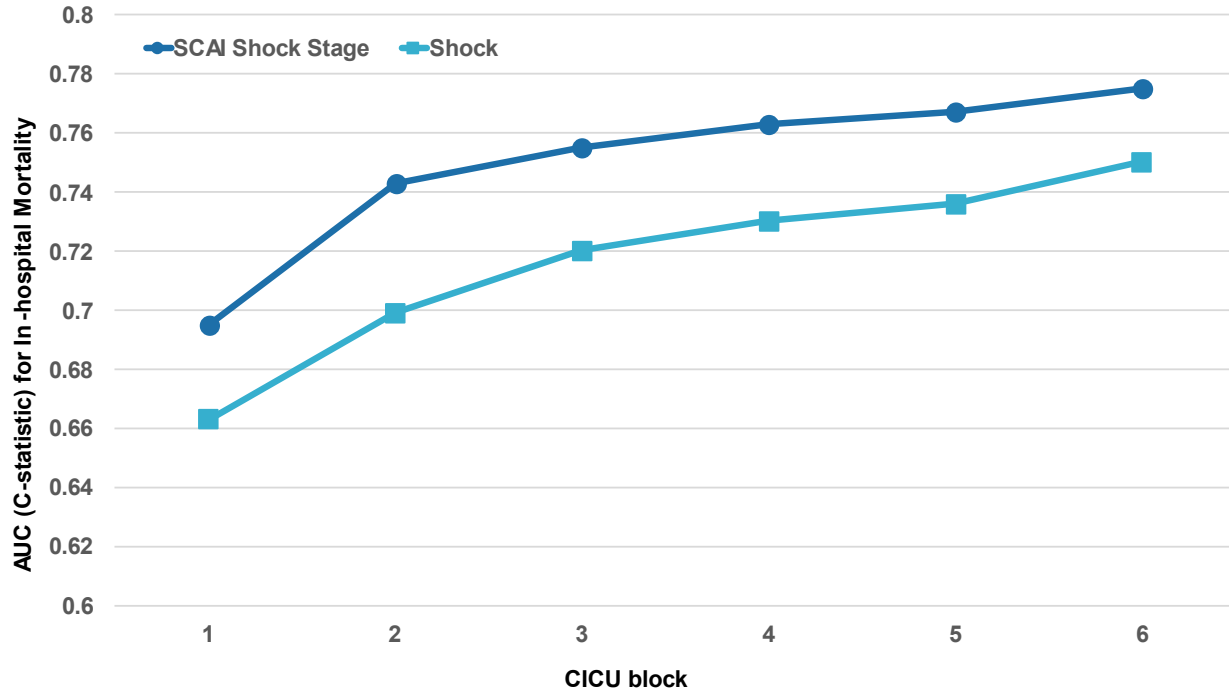

CICU, cardiac intensive care unit; SCAI, Society for Cardiovascular Angiography and Interventions.

**Figure S5. Cumulative percentage of all CICU and in-hospital deaths (i.e., sensitivity) identified by shock (using the SCAI definition) in each CICU block.**

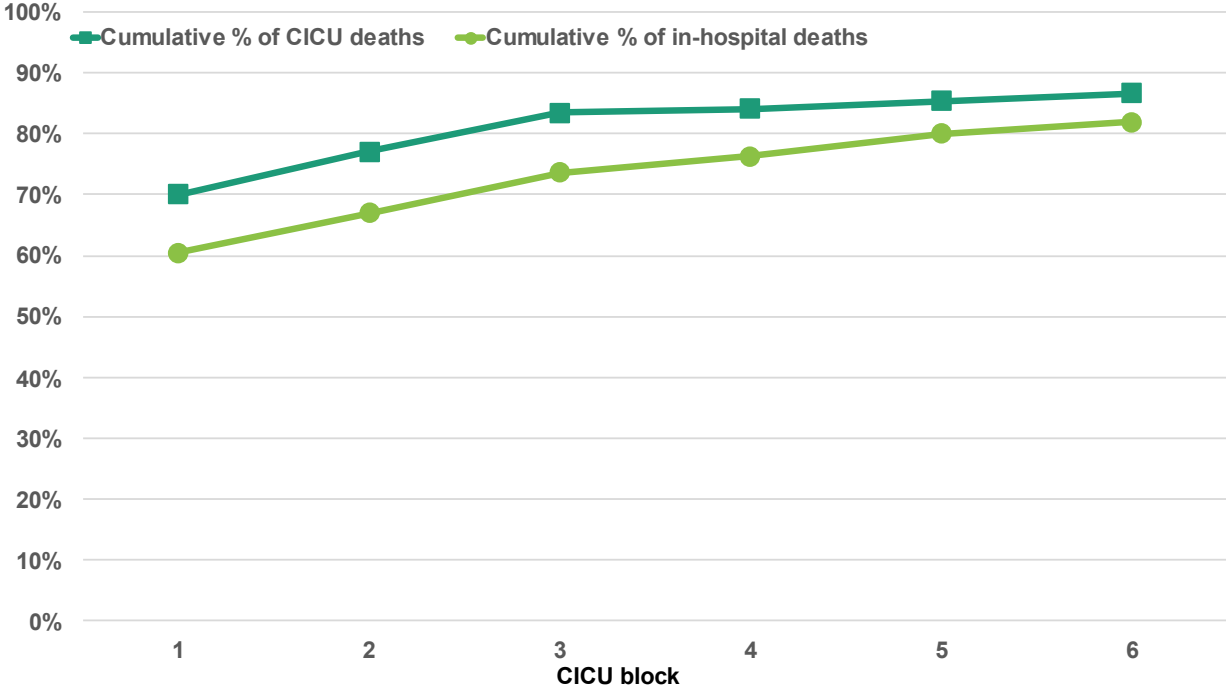

CICU, cardiac intensive care unit; SCAI, Society for Cardiovascular Angiography and Interventions.
